# Supplementary material for: A new approach towards biomarker selection in estimation of human exposure to chiral chemicals: a case study of mephedrone
Source: PubMed Central journal article supplement (PMC5693930; doi:10.1038/s41598-017-12581-3), 2017-11-02
Supplement: 41598_2017_12581_MOESM1_ESM.pdf [file 41598_2017_12581_MOESM1_ESM.pdf]

## A new approach towards biomarker selection in estimation of human exposure to chiral chemicals: a case study of mephedrone

Erika Castrignanò, Marie Mardal, Axel Rydevik, Bram Miserez, John Ramsey, Trevor Shine, G. Dan Pantoş, Markus R. Meyer, B. Kasprzyk-Hordern

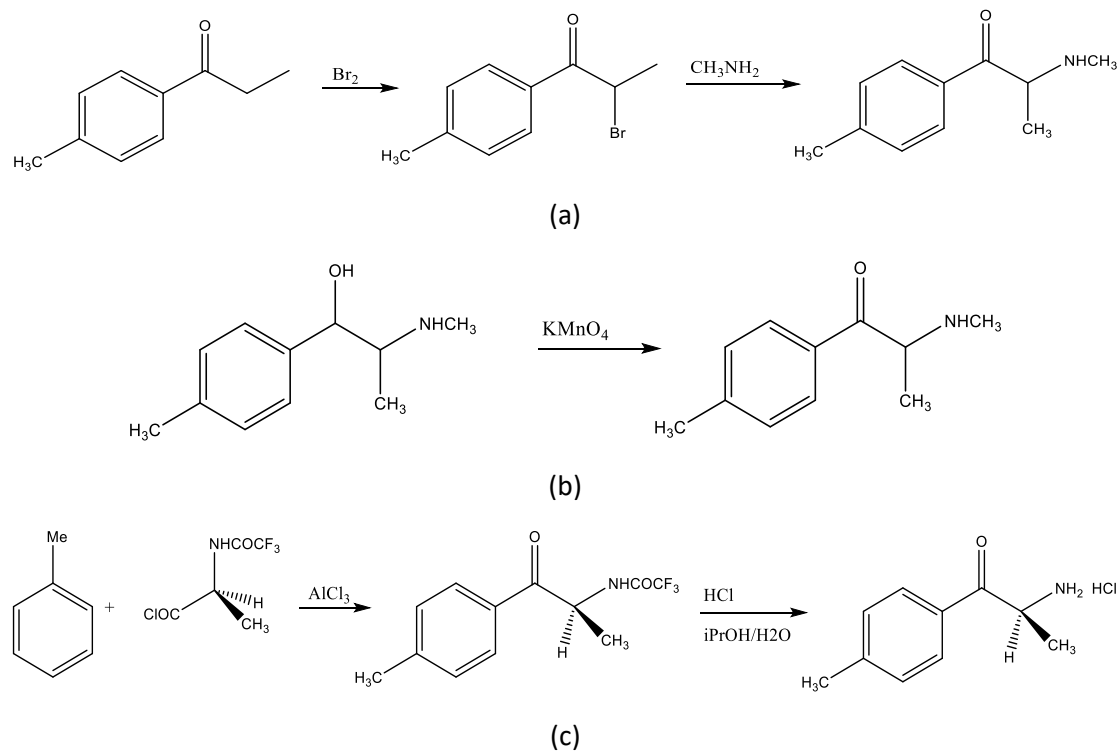

**Figure S1** Synthesis of ( $\pm$ )-mephedrone (a, b) (modified from Schifano et al. (2011) (Schifano *et al.*, 2011) and of *S*-(-)-mephedrone (c) (modified from Osorio-Olivares et al. (2003) (Osorio-Olivares *et al.*, 2003).

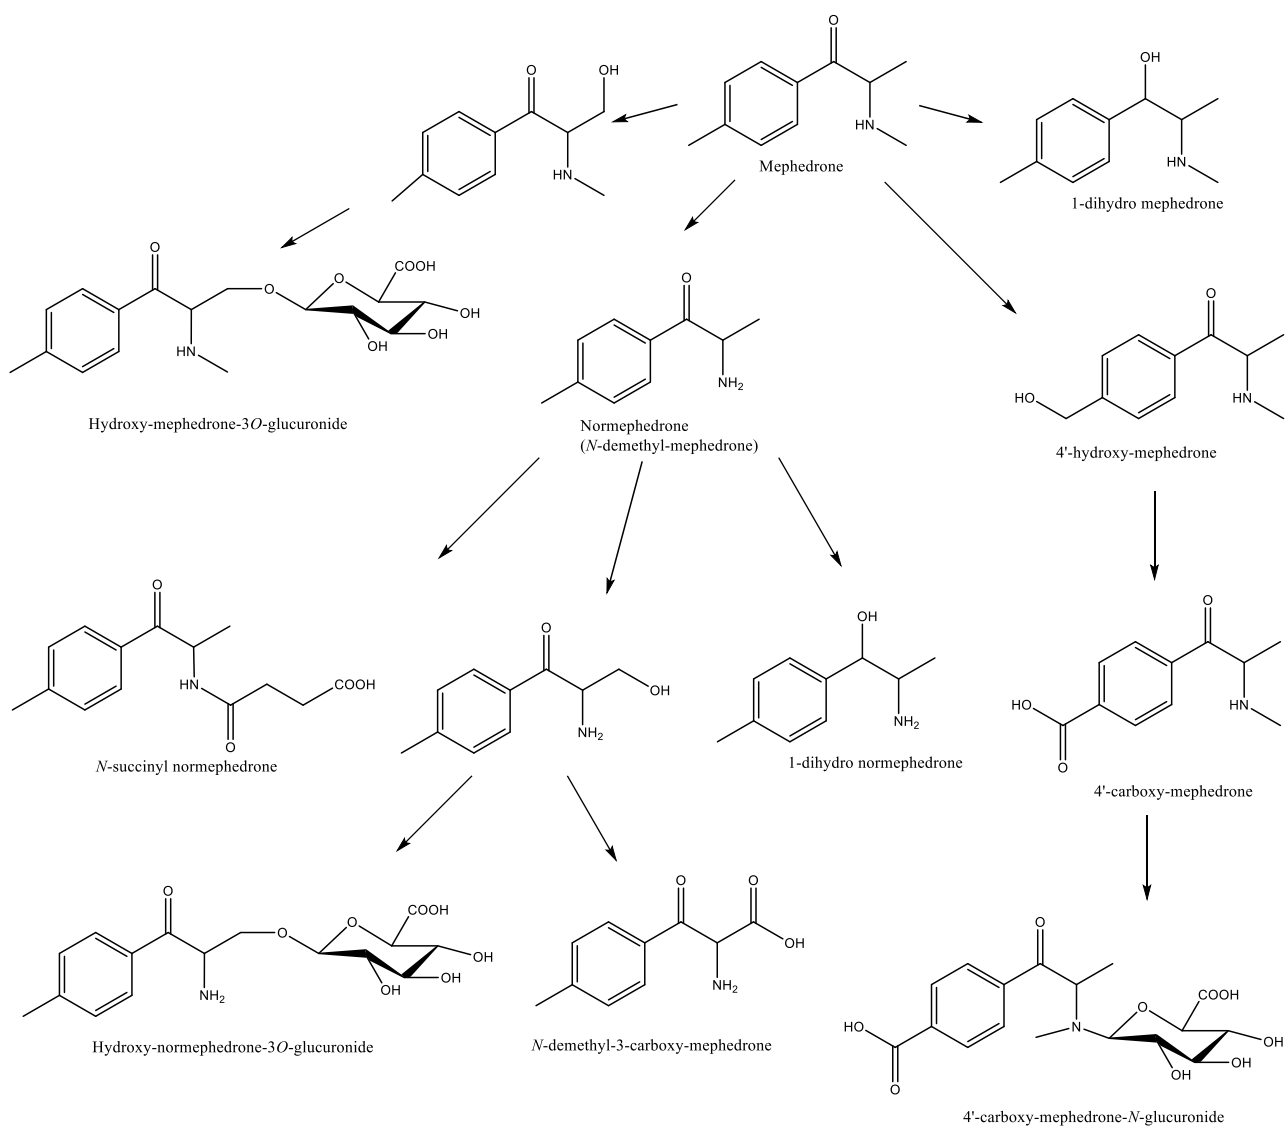

**Figure S2** Proposed mephedrone metabolism in humans (modified from Pozo et al. (2014)).

**Table S1** Mephedrone concentrations and population-normalised mass loads in wastewater samples during one week monitoring campaign in 2014 (from 11<sup>th</sup> to 17<sup>th</sup> March) and in 2015 (from 10<sup>th</sup> to 16<sup>th</sup> March) in the UK (<sup>a</sup>Population Equivalent).

| 2014      |                                             |                 |                                        |                                                                                          |                                        |                                                                                          |                                        |                                                                                          |
|-----------|---------------------------------------------|-----------------|----------------------------------------|------------------------------------------------------------------------------------------|----------------------------------------|------------------------------------------------------------------------------------------|----------------------------------------|------------------------------------------------------------------------------------------|
| Day       | Flow<br>[m <sup>3</sup> day <sup>-1</sup> ] | PE <sup>a</sup> | <i>R</i> -(+)-Mephedrone               |                                                                                          | <i>S</i> -(-)-Mephedrone               |                                                                                          | (±)-Mephedrone                         |                                                                                          |
|           |                                             |                 | Concentration<br>[ng L <sup>-1</sup> ] | Population-normalised<br>mass loads [mg 1000<br>people <sup>-1</sup> day <sup>-1</sup> ] | Concentration<br>[ng L <sup>-1</sup> ] | Population-normalised<br>mass loads [mg 1000<br>people <sup>-1</sup> day <sup>-1</sup> ] | Concentration<br>[ng L <sup>-1</sup> ] | Population-normalised<br>mass loads [mg 1000<br>people <sup>-1</sup> day <sup>-1</sup> ] |
| Monday    | 199012                                      | 886650          | 42 ± 7                                 | 9.3                                                                                      | 29 ± 2                                 | 6.5                                                                                      | 70.5                                   | 15.8                                                                                     |
| Tuesday   | 216049                                      | 886650          | 18 ± 6                                 | 4.3                                                                                      | 14 ± 5                                 | 3.4                                                                                      | 31.8                                   | 7.7                                                                                      |
| Wednesday | 214229                                      | 886650          | 32 ± 10                                | 7.7                                                                                      | 28 ± 3                                 | 6.6                                                                                      | 59.3                                   | 14.3                                                                                     |
| Thursday  | 208782                                      | 886650          | 18 ± 3                                 | 4.2                                                                                      | 14 ± 6                                 | 3.4                                                                                      | 32.3                                   | 7.6                                                                                      |
| Friday    | 208644                                      | 886650          | 22 ± 7                                 | 5.1                                                                                      | 18 ± 5                                 | 4.3                                                                                      | 40.0                                   | 9.4                                                                                      |
| Saturday  | 204287                                      | 886650          | 67 ± 15                                | 15.4                                                                                     | 47 ± 6                                 | 10.8                                                                                     | 114.0                                  | 26.3                                                                                     |
| Sunday    | 198221                                      | 886650          | 53 ± 11                                | 11.8                                                                                     | 44 ± 5                                 | 9.8                                                                                      | 96.5                                   | 21.6                                                                                     |
| Average   |                                             |                 |                                        | 8.3                                                                                      |                                        | 6.4                                                                                      |                                        | 14.7                                                                                     |
| SD        |                                             |                 |                                        | 4.2                                                                                      |                                        | 3.0                                                                                      |                                        | 7.2                                                                                      |
| CV        |                                             |                 |                                        | 0.5                                                                                      |                                        | 0.5                                                                                      |                                        | 0.5                                                                                      |
| 2015      |                                             |                 |                                        |                                                                                          |                                        |                                                                                          |                                        |                                                                                          |
| Day       | Flow<br>[m <sup>3</sup> day <sup>-1</sup> ] | PE <sup>a</sup> | <i>R</i> -(+)-Mephedrone               |                                                                                          | <i>S</i> -(-)-Mephedrone               |                                                                                          | (±)-Mephedrone                         |                                                                                          |
|           |                                             |                 | Concentration<br>[ng L <sup>-1</sup> ] | Population-normalised<br>mass loads [mg 1000<br>people <sup>-1</sup> day <sup>-1</sup> ] | Concentration<br>[ng L <sup>-1</sup> ] | Population-normalised<br>mass loads [mg 1000<br>people <sup>-1</sup> day <sup>-1</sup> ] | Concentration<br>[ng L <sup>-1</sup> ] | Population-normalised<br>mass loads [mg 1000<br>people <sup>-1</sup> day <sup>-1</sup> ] |
| Monday    | 197493                                      | 886650          | 67 ± 5                                 | 14.9                                                                                     | 72 ± 7                                 | 16.1                                                                                     | 140                                    | 31.1                                                                                     |
| Tuesday   | 204491                                      | 886650          | 37 ± 6                                 | 8.5                                                                                      | 27 ± 2                                 | 6.3                                                                                      | 65                                     | 14.9                                                                                     |
| Wednesday | 198950                                      | 886650          | 38 ± 3                                 | 8.5                                                                                      | 38 ± 3                                 | 8.5                                                                                      | 76                                     | 17.1                                                                                     |
| Thursday  | 197523                                      | 886650          | 37 ± 5                                 | 8.2                                                                                      | 33 ± 2                                 | 7.4                                                                                      | 70                                     | 15.6                                                                                     |
| Friday    | 252682                                      | 886650          | 45 ± 2                                 | 12.7                                                                                     | 28 ± 1                                 | 8.1                                                                                      | 73                                     | 20.8                                                                                     |
| Saturday  | 220687                                      | 886650          | 106 ± 5                                | 26.3                                                                                     | 86 ± 4                                 | 21.4                                                                                     | 192                                    | 47.7                                                                                     |
| Sunday    | 193194                                      | 886650          | 90 ± 6                                 | 19.6                                                                                     | 58 ± 2                                 | 12.5                                                                                     | 148                                    | 32.1                                                                                     |
| Average   |                                             |                 |                                        | 14.1                                                                                     |                                        | 11.5                                                                                     |                                        | 25.6                                                                                     |
| SD        |                                             |                 |                                        | 6.8                                                                                      |                                        | 5.6                                                                                      |                                        | 12.0                                                                                     |
| CV        |                                             |                 |                                        | 0.5                                                                                      |                                        | 0.5                                                                                      |                                        | 0.5                                                                                      |

**Table S2** Target screening analysis in wastewater and in pHLM by using LC-QTOF (*PI* means precursor ion, *DI* daughter ion).

| STANDARD MEPHEDRONE-D <sub>3</sub>                                                  |                                |                                      |                  |                                                                                     |                  |                                                                                       |                  |
|-------------------------------------------------------------------------------------|--------------------------------|--------------------------------------|------------------|-------------------------------------------------------------------------------------|------------------|---------------------------------------------------------------------------------------|------------------|
| Chromatogram                                                                        | In mobile phase                |                                      |                  | In wastewater                                                                       |                  | In pHLM                                                                               |                  |
|                                                                                     | Theor. mass [M+H] <sup>+</sup> | Experimental mass [M+H] <sup>+</sup> | Mass Error (ppm) | Experimental mass [M+H] <sup>+</sup>                                                | Mass Error (ppm) | Experimental mass [M+H] <sup>+</sup>                                                  | Mass Error (ppm) |
| 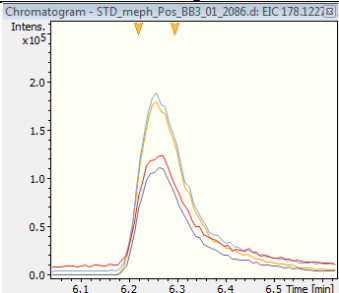   |                                |                                      |                  |   |                  |    |                  |
| <b>PI</b>                                                                           | 181.1415                       | 181.1417                             | 1.10             | 181.1408                                                                            | -3.86            | 181.1416                                                                              | 0.55             |
| <b>DI</b>                                                                           | 163.1309                       | 163.1310                             | 0.61             | 163.1303                                                                            | -3.68            | 163.1310                                                                              | 0.61             |
| MEPHEDRONE                                                                          |                                |                                      |                  |                                                                                     |                  |                                                                                       |                  |
| Chromatogram                                                                        | In mobile phase                |                                      |                  | In wastewater                                                                       |                  | In pHLM                                                                               |                  |
|                                                                                     | Theor. mass [M+H] <sup>+</sup> | Experimental mass [M+H] <sup>+</sup> | Mass Error (ppm) | Experimental mass [M+H] <sup>+</sup>                                                | Mass Error (ppm) | Experimental mass [M+H] <sup>+</sup>                                                  | Mass Error (ppm) |
|   |                                |                                      |                  |  |                  |   |                  |
| <b>PI</b>                                                                           | 178.1226                       | 178.1227                             | 0.56             | 178.1219                                                                            | -3.93            | 178.1228                                                                              | 1.12             |
| <b>DI</b>                                                                           | 160.1121                       | 160.1120                             | -0.62            | 160.1115                                                                            | -3.75            | 160.1121                                                                              | 0                |
| NORMEPHEDRONE                                                                       |                                |                                      |                  |                                                                                     |                  |                                                                                       |                  |
| Chromatogram                                                                        | In mobile phase                |                                      |                  | In wastewater                                                                       |                  | In pHLM                                                                               |                  |
|                                                                                     | Theor. mass [M+H] <sup>+</sup> | Experimental mass [M+H] <sup>+</sup> | Mass Error (ppm) | Experimental mass [M+H] <sup>+</sup>                                                | Mass Error (ppm) | Experimental mass [M+H] <sup>+</sup>                                                  | Mass Error (ppm) |
|  |                                |                                      |                  | -                                                                                   |                  |  |                  |
| <b>PI</b>                                                                           | 164.1070                       | 164.1071                             | 0.61             | -                                                                                   | n.d.             | 164.1070                                                                              | 0                |
| <b>DI</b>                                                                           | 147.0804                       | 147.0804                             | 0                | -                                                                                   | n.d.             | 147.0807                                                                              | 2.04             |
| <b>DI</b>                                                                           | 119.0855                       | 119.0854                             | -0.84            | -                                                                                   | n.d.             | 119.0857                                                                              | 1.68             |

**Table S3** Non-targeted analysis by LC Q-TOF: mephedrone metabolites predicted in wastewater and in pHLM by using MetID software (*Theor* means theoretical and *Exp.* experimental).

| Metabolite                   | Formula    | Ionization mode | Rt   | Theor. mass<br>([M+H] <sup>+</sup> or [M-H] <sup>-</sup> ) | Precursor ion<br>Exp. mass<br>([M+H] <sup>+</sup> or [M-H] <sup>-</sup> ) | Mass Error<br>(ppm) |
|------------------------------|------------|-----------------|------|------------------------------------------------------------|---------------------------------------------------------------------------|---------------------|
| <b><i>Wastewater</i></b>     |            |                 |      |                                                            |                                                                           |                     |
| Dihydro-mephedrone           | C11H17NO   | ESI +           | 5.50 | 180.1383                                                   | 180.1384                                                                  | 0.55                |
| Nor-hydroxy-tolyl-mephedrone | C10H13NO2  | ESI -           | 6.70 | 178.0874                                                   | 178.0871                                                                  | -1.68               |
| 4'-carboxy mephedrone        | C11H13NO3  | ESI -           | 5.85 | 206.0823                                                   | 206.0822                                                                  | 0.48                |
| 4'-carboxy normephedrone     | C10H11NO3  | ESI -           | 6.92 | 192.067                                                    | 192.066                                                                   | 0.52                |
| Normephedrone-N-sulphate     | C10H13NO4S | ESI +           | 7.15 | 244.0640                                                   | 244.0638                                                                  | 0.82                |
| <b><i>pHLM</i></b>           |            |                 |      |                                                            |                                                                           |                     |
| Normephedrone                | C10H13NO   | ESI +           | 6.18 | 164.1070                                                   | 164.1064                                                                  | 3.65                |
| 4'-carboxy-normephedrone     | C10H11NO3  | ESI -           | 6.90 | 194.0812                                                   | 194.0820                                                                  | 4.12                |

**Table S4** Untarget screening analysis in wastewater and in pHLM by using LC-QTOF.

| 1-DIHYDRO-NORMEPHEDRONE |                                                                                     |                                                                                     |                  |                                                                                     |                  |      |
|-------------------------|-------------------------------------------------------------------------------------|-------------------------------------------------------------------------------------|------------------|-------------------------------------------------------------------------------------|------------------|------|
|                         | Structure                                                                           | In wastewater                                                                       |                  | In pHLM                                                                             |                  |      |
| Chromatogram            | 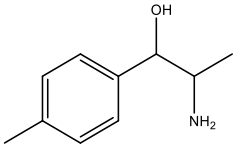   |    |                  | -                                                                                   |                  |      |
|                         | Theor. mass [M+H] <sup>+</sup>                                                      | Experimental mass [M+H] <sup>+</sup>                                                | Mass Error (ppm) | Experimental mass [M+H] <sup>+</sup>                                                | Mass Error (ppm) |      |
|                         | PI                                                                                  | 1166.1226                                                                           | 166.1223         | -1.80                                                                               | -                | -    |
|                         | DI                                                                                  | 1148.1121                                                                           | 148.1119         | -1.35                                                                               | -                | -    |
|                         | DI                                                                                  | 115.0542                                                                            | 115.0528         | -8.70                                                                               | -                | -    |
| 4'-HYDROXY-MEPHEDRONE   |                                                                                     |                                                                                     |                  |                                                                                     |                  |      |
|                         | Structure                                                                           | In wastewater                                                                       |                  | In pHLM                                                                             |                  |      |
| Chromatogram            |   |   |                  |  |                  |      |
|                         | Theor. mass [M+H] <sup>+</sup>                                                      | Experimental mass [M+H] <sup>+</sup>                                                | Mass Error (ppm) | Experimental mass [M+H] <sup>+</sup>                                                | Mass Error (ppm) |      |
|                         | PI                                                                                  | 194.1176                                                                            | 194.1170         | -3.09                                                                               | 194.1179         | 1.54 |
|                         | DI                                                                                  | 158.0964                                                                            |                  | -                                                                                   | 158.0966         | 1.26 |
|                         | DI                                                                                  | 146.0964                                                                            |                  | -                                                                                   | 146.0966         | 1.37 |
| DI                      | 133.0648                                                                            |                                                                                     | -                | 133.0652                                                                            | 3.00             |      |
| 4'-CARBOXY-MEPHEDRONE   |                                                                                     |                                                                                     |                  |                                                                                     |                  |      |
|                         | Structure                                                                           | In wastewater                                                                       |                  | In pHLM                                                                             |                  |      |
| Chromatogram            |  |  |                  | -                                                                                   |                  |      |
|                         | Theor. mass [M+H] <sup>+</sup>                                                      | Experimental mass [M+H] <sup>+</sup>                                                | Mass Error (ppm) | Experimental mass [M+H] <sup>+</sup>                                                | Mass Error (ppm) |      |
|                         | PI                                                                                  | 208.0968                                                                            | 208.0865         | -1.44                                                                               | -                | -    |
|                         | DI                                                                                  | 144.0808                                                                            | 144.0805         | -2.08                                                                               | -                | -    |

**Table S5** Data dependent MS/MS fragmentation (ddMS2) spectra of mephedrone metabolites detected in rat urine sample using LC Q-E.

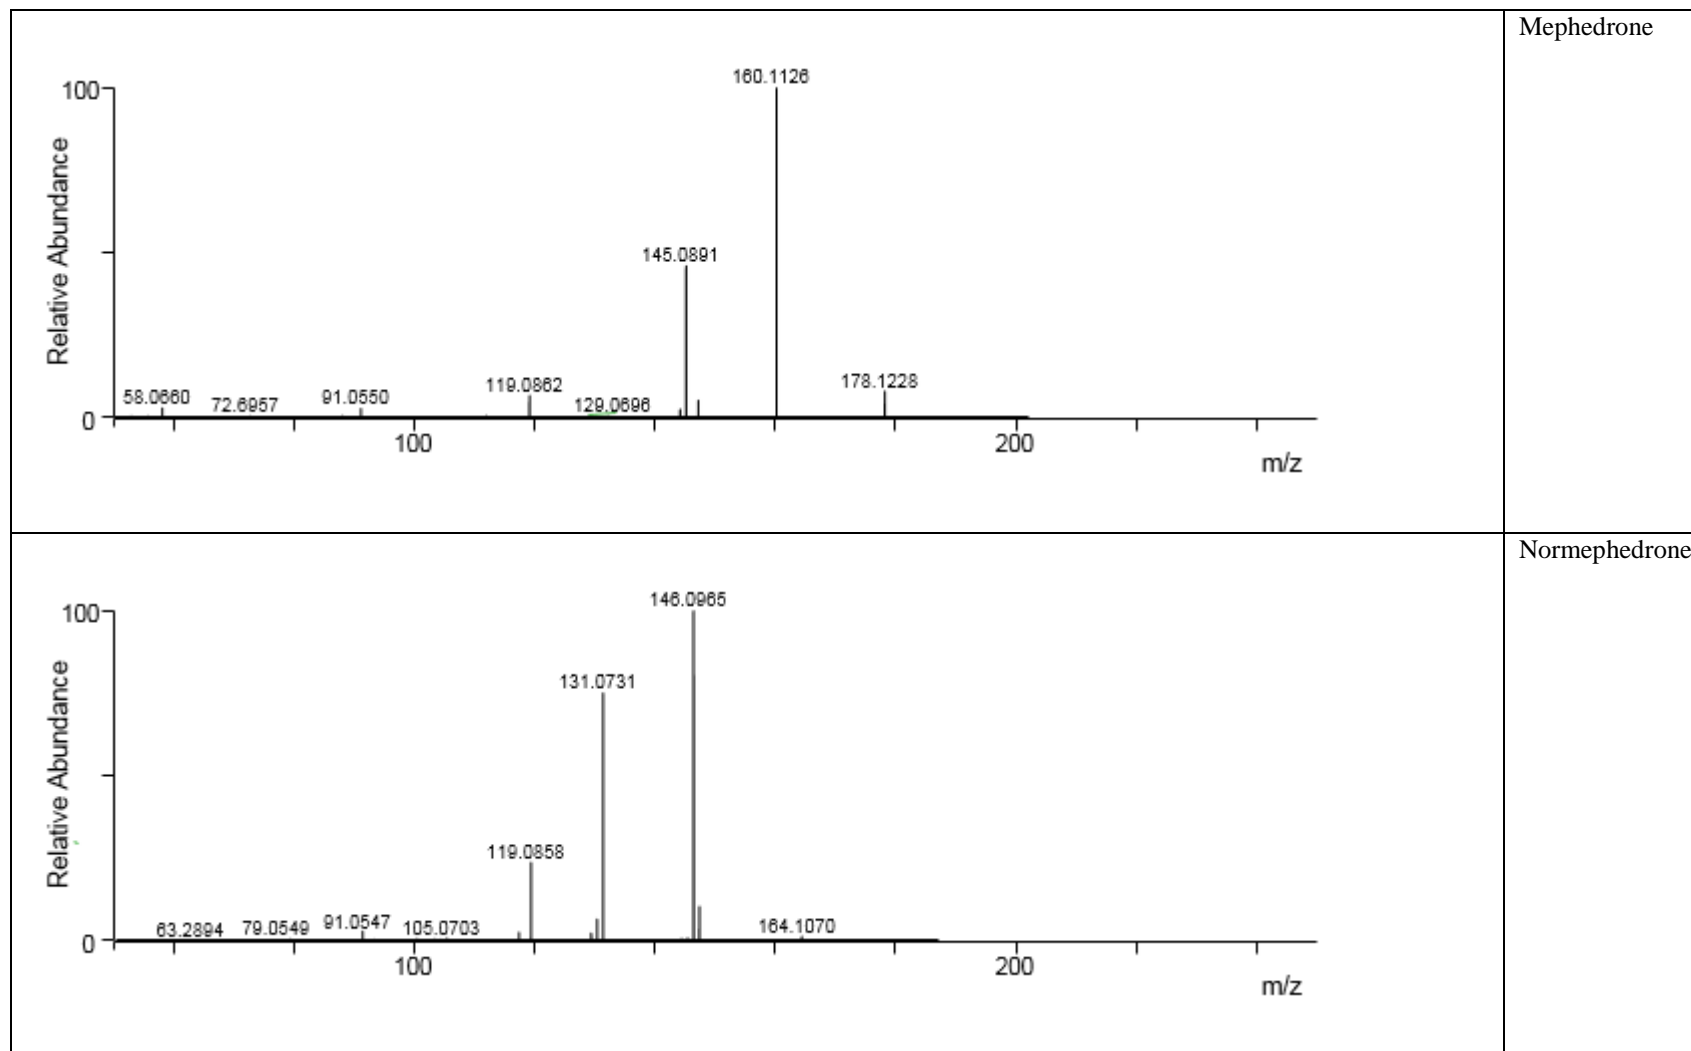

| 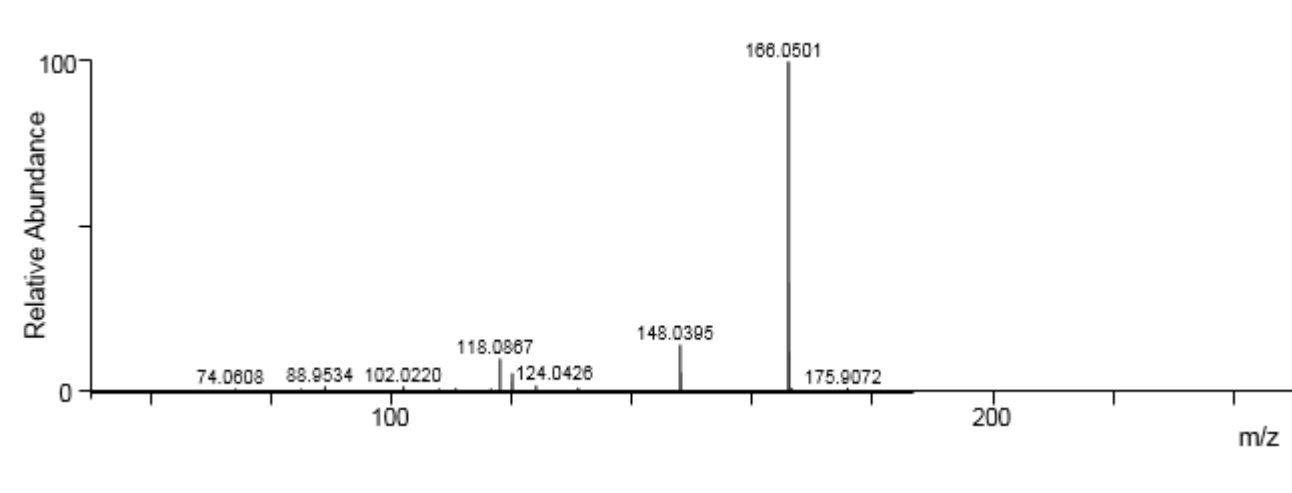 <p>Mass spectrum of 1-dihydro-normephedrone. The y-axis is labeled 'Relative Abundance' and ranges from 0 to 100. The x-axis is labeled 'm/z' and ranges from 0 to 200. The base peak is at m/z 166.0501. Other significant peaks are labeled at m/z 74.0608, 88.9534, 102.0220, 118.0867, 124.0426, 148.0395, and 175.9072.</p> <table border="1"><thead><tr><th>m/z</th><th>Relative Abundance</th></tr></thead><tbody><tr><td>74.0608</td><td>~5</td></tr><tr><td>88.9534</td><td>~5</td></tr><tr><td>102.0220</td><td>~5</td></tr><tr><td>118.0867</td><td>~15</td></tr><tr><td>124.0426</td><td>~10</td></tr><tr><td>148.0395</td><td>~25</td></tr><tr><td>166.0501</td><td>100</td></tr><tr><td>175.9072</td><td>~5</td></tr></tbody></table>                                                                                                                                                                                                                                           | m/z                | Relative Abundance | 74.0608 | ~5 | 88.9534 | ~5 | 102.0220 | ~5 | 118.0867 | ~15 | 124.0426 | ~10 | 148.0395 | ~25 | 166.0501 | 100 | 175.9072 | ~5  | 1-dihydro-normephedrone |    |          |     |          |    |          |     |          |    |                       |
|----------------------------------------------------------------------------------------------------------------------------------------------------------------------------------------------------------------------------------------------------------------------------------------------------------------------------------------------------------------------------------------------------------------------------------------------------------------------------------------------------------------------------------------------------------------------------------------------------------------------------------------------------------------------------------------------------------------------------------------------------------------------------------------------------------------------------------------------------------------------------------------------------------------------------------------------------------------------------------------------------------------------------------------------------------------------------------|--------------------|--------------------|---------|----|---------|----|----------|----|----------|-----|----------|-----|----------|-----|----------|-----|----------|-----|-------------------------|----|----------|-----|----------|----|----------|-----|----------|----|-----------------------|
| m/z                                                                                                                                                                                                                                                                                                                                                                                                                                                                                                                                                                                                                                                                                                                                                                                                                                                                                                                                                                                                                                                                              | Relative Abundance |                    |         |    |         |    |          |    |          |     |          |     |          |     |          |     |          |     |                         |    |          |     |          |    |          |     |          |    |                       |
| 74.0608                                                                                                                                                                                                                                                                                                                                                                                                                                                                                                                                                                                                                                                                                                                                                                                                                                                                                                                                                                                                                                                                          | ~5                 |                    |         |    |         |    |          |    |          |     |          |     |          |     |          |     |          |     |                         |    |          |     |          |    |          |     |          |    |                       |
| 88.9534                                                                                                                                                                                                                                                                                                                                                                                                                                                                                                                                                                                                                                                                                                                                                                                                                                                                                                                                                                                                                                                                          | ~5                 |                    |         |    |         |    |          |    |          |     |          |     |          |     |          |     |          |     |                         |    |          |     |          |    |          |     |          |    |                       |
| 102.0220                                                                                                                                                                                                                                                                                                                                                                                                                                                                                                                                                                                                                                                                                                                                                                                                                                                                                                                                                                                                                                                                         | ~5                 |                    |         |    |         |    |          |    |          |     |          |     |          |     |          |     |          |     |                         |    |          |     |          |    |          |     |          |    |                       |
| 118.0867                                                                                                                                                                                                                                                                                                                                                                                                                                                                                                                                                                                                                                                                                                                                                                                                                                                                                                                                                                                                                                                                         | ~15                |                    |         |    |         |    |          |    |          |     |          |     |          |     |          |     |          |     |                         |    |          |     |          |    |          |     |          |    |                       |
| 124.0426                                                                                                                                                                                                                                                                                                                                                                                                                                                                                                                                                                                                                                                                                                                                                                                                                                                                                                                                                                                                                                                                         | ~10                |                    |         |    |         |    |          |    |          |     |          |     |          |     |          |     |          |     |                         |    |          |     |          |    |          |     |          |    |                       |
| 148.0395                                                                                                                                                                                                                                                                                                                                                                                                                                                                                                                                                                                                                                                                                                                                                                                                                                                                                                                                                                                                                                                                         | ~25                |                    |         |    |         |    |          |    |          |     |          |     |          |     |          |     |          |     |                         |    |          |     |          |    |          |     |          |    |                       |
| 166.0501                                                                                                                                                                                                                                                                                                                                                                                                                                                                                                                                                                                                                                                                                                                                                                                                                                                                                                                                                                                                                                                                         | 100                |                    |         |    |         |    |          |    |          |     |          |     |          |     |          |     |          |     |                         |    |          |     |          |    |          |     |          |    |                       |
| 175.9072                                                                                                                                                                                                                                                                                                                                                                                                                                                                                                                                                                                                                                                                                                                                                                                                                                                                                                                                                                                                                                                                         | ~5                 |                    |         |    |         |    |          |    |          |     |          |     |          |     |          |     |          |     |                         |    |          |     |          |    |          |     |          |    |                       |
|  <p>Mass spectrum of 4'-carboxy-mephedrone. The y-axis is labeled 'Relative Abundance' and ranges from 0 to 100. The x-axis is labeled 'm/z' and ranges from 0 to 200. The base peak is at m/z 146.0965. Other significant peaks are labeled at m/z 58.0660, 79.0548, 91.0548, 105.0703, 117.0703, 131.0732, 149.0598, 160.0758, 172.0757, 175.0632, 190.0863, and 208.0969.</p> <table border="1"><thead><tr><th>m/z</th><th>Relative Abundance</th></tr></thead><tbody><tr><td>58.0660</td><td>~5</td></tr><tr><td>79.0548</td><td>~5</td></tr><tr><td>91.0548</td><td>~5</td></tr><tr><td>105.0703</td><td>~15</td></tr><tr><td>117.0703</td><td>~5</td></tr><tr><td>131.0732</td><td>~60</td></tr><tr><td>146.0965</td><td>100</td></tr><tr><td>149.0598</td><td>~35</td></tr><tr><td>160.0758</td><td>~5</td></tr><tr><td>172.0757</td><td>~45</td></tr><tr><td>175.0632</td><td>~5</td></tr><tr><td>190.0863</td><td>~10</td></tr><tr><td>208.0969</td><td>~5</td></tr></tbody></table> | m/z                | Relative Abundance | 58.0660 | ~5 | 79.0548 | ~5 | 91.0548  | ~5 | 105.0703 | ~15 | 117.0703 | ~5  | 131.0732 | ~60 | 146.0965 | 100 | 149.0598 | ~35 | 160.0758                | ~5 | 172.0757 | ~45 | 175.0632 | ~5 | 190.0863 | ~10 | 208.0969 | ~5 | 4'-carboxy-mephedrone |
| m/z                                                                                                                                                                                                                                                                                                                                                                                                                                                                                                                                                                                                                                                                                                                                                                                                                                                                                                                                                                                                                                                                              | Relative Abundance |                    |         |    |         |    |          |    |          |     |          |     |          |     |          |     |          |     |                         |    |          |     |          |    |          |     |          |    |                       |
| 58.0660                                                                                                                                                                                                                                                                                                                                                                                                                                                                                                                                                                                                                                                                                                                                                                                                                                                                                                                                                                                                                                                                          | ~5                 |                    |         |    |         |    |          |    |          |     |          |     |          |     |          |     |          |     |                         |    |          |     |          |    |          |     |          |    |                       |
| 79.0548                                                                                                                                                                                                                                                                                                                                                                                                                                                                                                                                                                                                                                                                                                                                                                                                                                                                                                                                                                                                                                                                          | ~5                 |                    |         |    |         |    |          |    |          |     |          |     |          |     |          |     |          |     |                         |    |          |     |          |    |          |     |          |    |                       |
| 91.0548                                                                                                                                                                                                                                                                                                                                                                                                                                                                                                                                                                                                                                                                                                                                                                                                                                                                                                                                                                                                                                                                          | ~5                 |                    |         |    |         |    |          |    |          |     |          |     |          |     |          |     |          |     |                         |    |          |     |          |    |          |     |          |    |                       |
| 105.0703                                                                                                                                                                                                                                                                                                                                                                                                                                                                                                                                                                                                                                                                                                                                                                                                                                                                                                                                                                                                                                                                         | ~15                |                    |         |    |         |    |          |    |          |     |          |     |          |     |          |     |          |     |                         |    |          |     |          |    |          |     |          |    |                       |
| 117.0703                                                                                                                                                                                                                                                                                                                                                                                                                                                                                                                                                                                                                                                                                                                                                                                                                                                                                                                                                                                                                                                                         | ~5                 |                    |         |    |         |    |          |    |          |     |          |     |          |     |          |     |          |     |                         |    |          |     |          |    |          |     |          |    |                       |
| 131.0732                                                                                                                                                                                                                                                                                                                                                                                                                                                                                                                                                                                                                                                                                                                                                                                                                                                                                                                                                                                                                                                                         | ~60                |                    |         |    |         |    |          |    |          |     |          |     |          |     |          |     |          |     |                         |    |          |     |          |    |          |     |          |    |                       |
| 146.0965                                                                                                                                                                                                                                                                                                                                                                                                                                                                                                                                                                                                                                                                                                                                                                                                                                                                                                                                                                                                                                                                         | 100                |                    |         |    |         |    |          |    |          |     |          |     |          |     |          |     |          |     |                         |    |          |     |          |    |          |     |          |    |                       |
| 149.0598                                                                                                                                                                                                                                                                                                                                                                                                                                                                                                                                                                                                                                                                                                                                                                                                                                                                                                                                                                                                                                                                         | ~35                |                    |         |    |         |    |          |    |          |     |          |     |          |     |          |     |          |     |                         |    |          |     |          |    |          |     |          |    |                       |
| 160.0758                                                                                                                                                                                                                                                                                                                                                                                                                                                                                                                                                                                                                                                                                                                                                                                                                                                                                                                                                                                                                                                                         | ~5                 |                    |         |    |         |    |          |    |          |     |          |     |          |     |          |     |          |     |                         |    |          |     |          |    |          |     |          |    |                       |
| 172.0757                                                                                                                                                                                                                                                                                                                                                                                                                                                                                                                                                                                                                                                                                                                                                                                                                                                                                                                                                                                                                                                                         | ~45                |                    |         |    |         |    |          |    |          |     |          |     |          |     |          |     |          |     |                         |    |          |     |          |    |          |     |          |    |                       |
| 175.0632                                                                                                                                                                                                                                                                                                                                                                                                                                                                                                                                                                                                                                                                                                                                                                                                                                                                                                                                                                                                                                                                         | ~5                 |                    |         |    |         |    |          |    |          |     |          |     |          |     |          |     |          |     |                         |    |          |     |          |    |          |     |          |    |                       |
| 190.0863                                                                                                                                                                                                                                                                                                                                                                                                                                                                                                                                                                                                                                                                                                                                                                                                                                                                                                                                                                                                                                                                         | ~10                |                    |         |    |         |    |          |    |          |     |          |     |          |     |          |     |          |     |                         |    |          |     |          |    |          |     |          |    |                       |
| 208.0969                                                                                                                                                                                                                                                                                                                                                                                                                                                                                                                                                                                                                                                                                                                                                                                                                                                                                                                                                                                                                                                                         | ~5                 |                    |         |    |         |    |          |    |          |     |          |     |          |     |          |     |          |     |                         |    |          |     |          |    |          |     |          |    |                       |



|                                                                                                                                                                                                                                                                                                                                                                               |                                                                                                |
|-------------------------------------------------------------------------------------------------------------------------------------------------------------------------------------------------------------------------------------------------------------------------------------------------------------------------------------------------------------------------------|------------------------------------------------------------------------------------------------|
| <p>Mass spectrum showing Relative Abundance versus m/z. The base peak is at m/z 105.0340. Other significant peaks are labeled at m/z 53.0395, 79.0549, 95.0498, 117.0578, 132.0809, 145.0521, 148.0757, 158.0601, 166.0984, 178.0707, 179.0939, and 194.0810. An inset shows a zoomed-in view of the m/z 194.0-194.2 region, highlighting peaks at 194.0810 and 194.1178.</p> | <p>4'-carboxy-normephedrone, (in the zoom also [M+H]<sup>+</sup> of 4'-hydroxy-mephedrone)</p> |
| <p>Mass spectrum showing Relative Abundance versus m/z. The base peak is at m/z 119.0495. Other significant peaks are labeled at m/z 58.0859, 83.0133, 101.0238, 145.0891, 160.1121, 176.1069, 194.1178, 232.7151, and 278.2971.</p>                                                                                                                                          | <p>Hydroxy-mephedrone-3O-glucuronide</p>                                                       |

|                                                                                                                                                                                                                                                                                                                     |                                                                                                       |
|---------------------------------------------------------------------------------------------------------------------------------------------------------------------------------------------------------------------------------------------------------------------------------------------------------------------|-------------------------------------------------------------------------------------------------------|
| <p>Mass spectrum showing Relative Abundance versus m/z for <math>\alpha</math>-Methyl-HO-normephedrone glucuronide (hydroxy-normephedrone-3O-glucuronide). The base peak is at m/z 162.0913. Other labeled peaks include m/z 73.0291, 113.0235, 119.0495, 144.0813, 180.1020, 187.4875, 245.3137, and 276.4579.</p> | <p><math>\alpha</math>-Methyl-HO-normephedrone glucuronide (hydroxy-normephedrone-3O-glucuronide)</p> |
| <p>Mass spectrum showing Relative Abundance versus m/z for Normephedrone glucuronide. The base peak is at m/z 146.0966. Other labeled peaks include m/z 73.0291, 89.1597, 101.0238, 126.0552, 164.1072, 186.0918, 228.1024, and 246.1122.</p>                                                                       | <p>Normephedrone glucuronide</p>                                                                      |

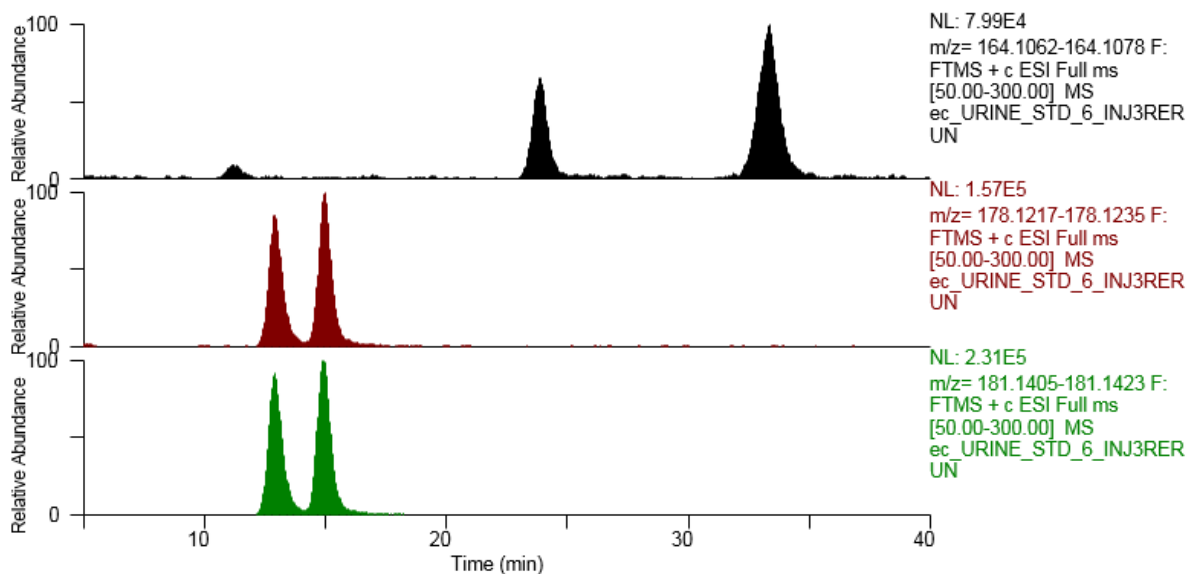

**Figure S3** Extracted ion chromatogram of normephedrone (black), mephedrone (red) and mephedrone-D<sub>3</sub> (green) in rat urine sample using chiral LC VP

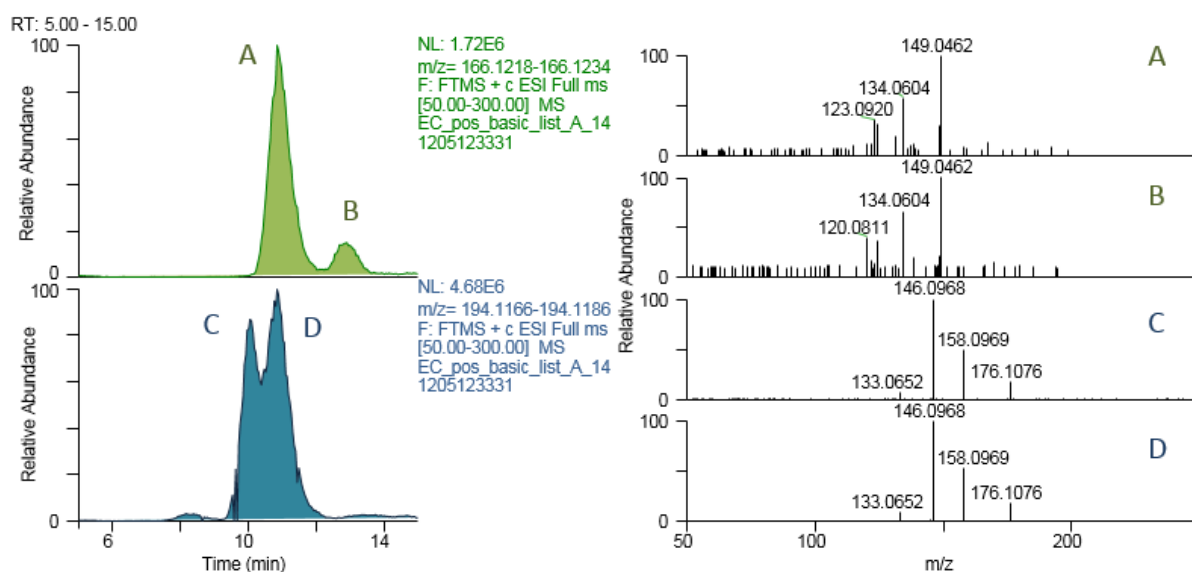

**Figure S4** Left: extracted ion chromatograms of 1-dihydro-normephedrone diastereoisomers (top) and partially separated 4'-hydroxy-mephedrone enantiomers (bottom) in rat urine sample using chiral LC VP and corresponding ESI+ (HR) mass spectra (right).

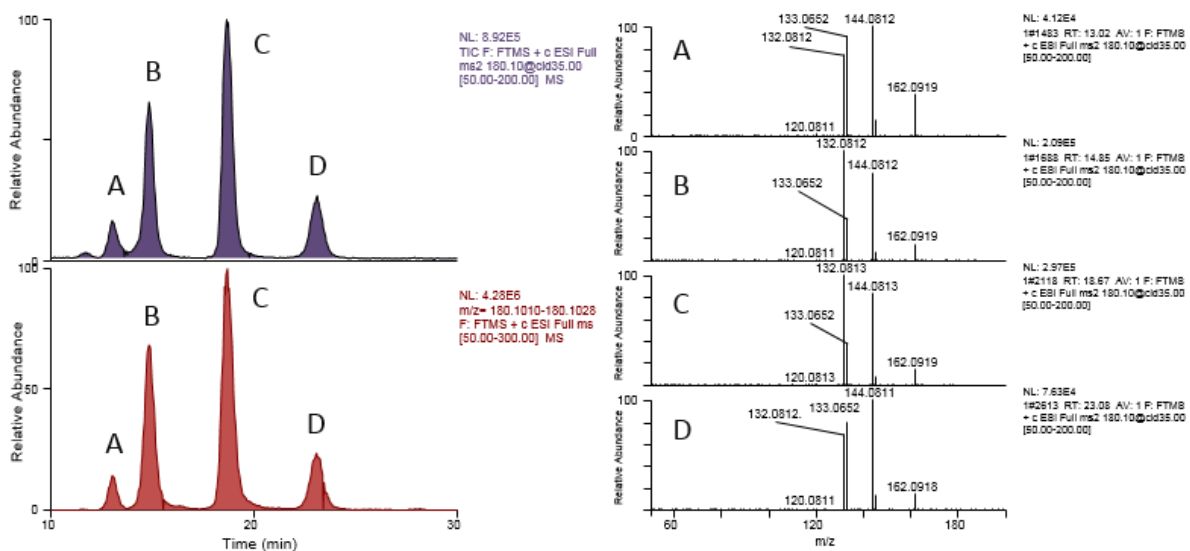

**Figure S5** 1-Dihydro-4'-oxomethyl-normephedrone enantiomers, labelled as A, B, C and D, were identified in rat urine by chiral LC VP. This compound has two chiral centres, therefore four peaks were detected with identical fragmentation patterns. On the left: top: total ion chromatogram of the nominal mass precursor, bottom: HR extracted ion chromatogram of the full scan. On the right: corresponding ESI+ (HR) mass spectra.

### R-(+)-Mephedrone

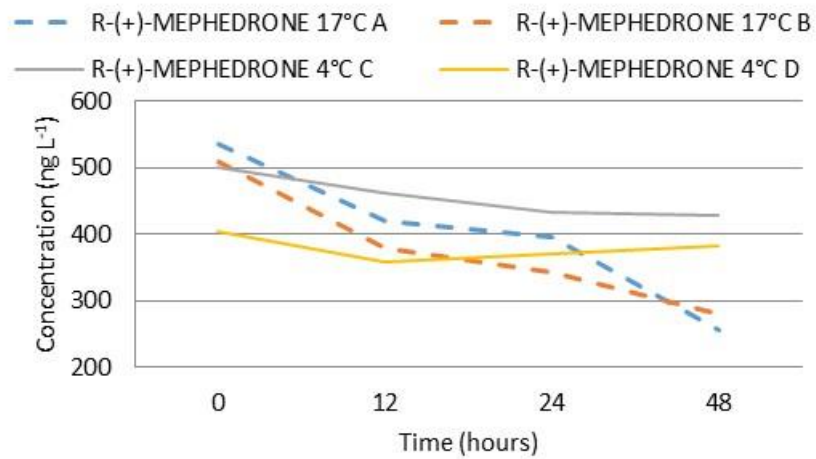

### S-(-)-Mephedrone

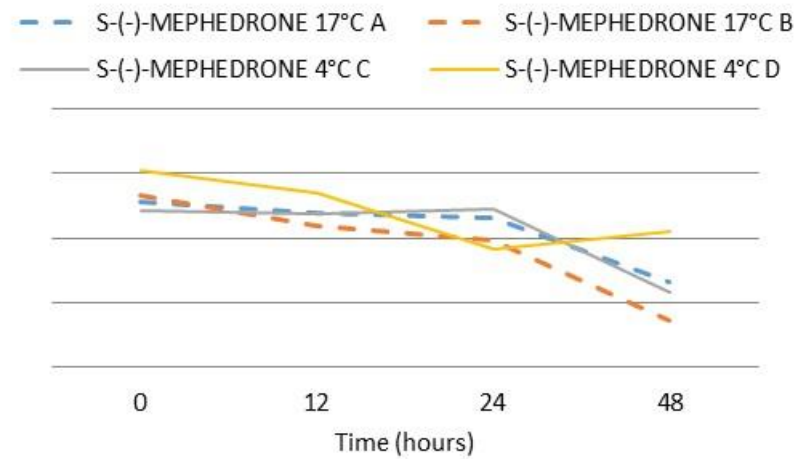

### Enantiomeric fraction of Mephedrone in spiked wastewater

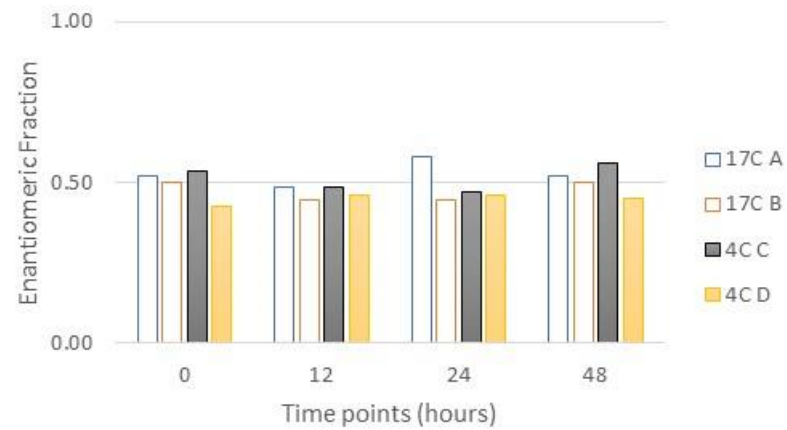

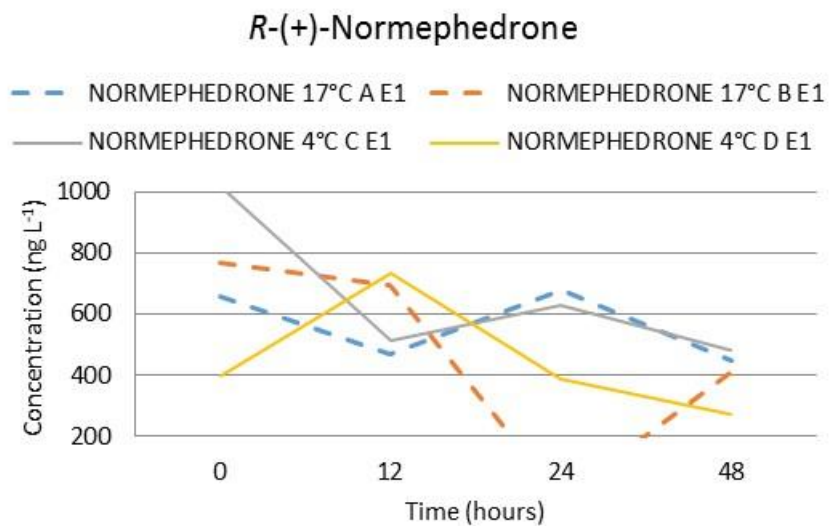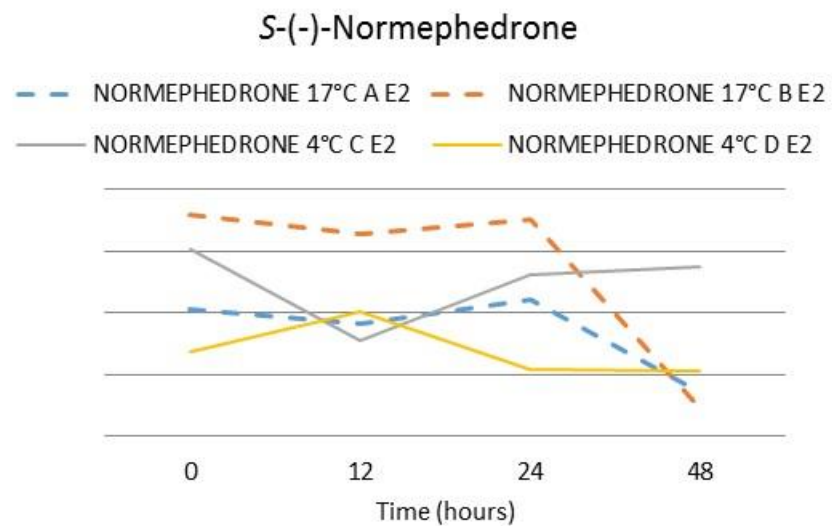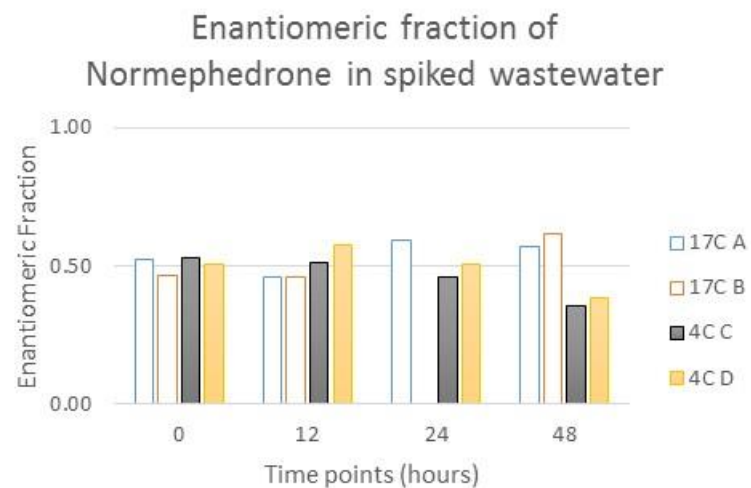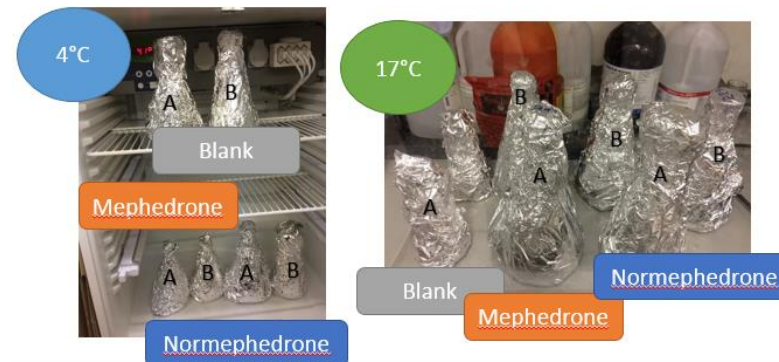

**Figure S6** Mephedrone and normephedrone concentrations and enantiomeric fraction in wastewater stability study. Picture of experimental settings.

**Table S6** Selected analytes and their properties (MW molecular weight, Exp experimental, Pred predicted, <sup>a</sup> predicted using ACD/labs software (<http://www.chemspider.com>)).

| Compound                      | CAS        | Formula                                          | MW    | LogP |                    | LogD <sup>a</sup> |        | Purity (%) | Supplier                           |
|-------------------------------|------------|--------------------------------------------------|-------|------|--------------------|-------------------|--------|------------|------------------------------------|
|                               |            |                                                  |       | Exp. | Pred. <sup>a</sup> | pH 5.5            | pH 7.4 |            |                                    |
| (±)-Mephedrone                | 189726-2-4 | C <sub>11</sub> H <sub>15</sub> NO               | 177.7 | -    | 1.86±0.31          | -0.03             | 1.55   | 99.8       | Sigma-Aldrich (Cerilliant product) |
| (±)-Normephedrone             | 1941-17-9  | C <sub>10</sub> H <sub>13</sub> NO               | 163.4 | -    | -                  | -                 | -      | 98.0       | Cayman Chemical Company            |
| (±)-Mephedrone-D <sub>3</sub> | 189972-9-9 | C <sub>11</sub> H <sub>12</sub> NOD <sub>3</sub> | 180.7 | -    | -                  | -                 | -      | 99.4       | Sigma-Aldrich                      |

### S1-Experimental settings, procedure for acetylation of rat urine sample and results.

It was hypothesised that the metabolic hydroxylation reaction may have occurred at different sites of the molecule. For this purpose, acetylated rat urine was injected in LC VP and gas chromatograph coupled to mass spectrometer (GC-MS) systems for suspected acetylated metabolites.

A blank and a positive rat urine sample underwent solid-phase extraction (SPE) with Isolute hydrophilic cation exchange (HCX) cartridges (130 mg, 3 mL, Biotage, Uppsala, Sweden). Cartridges were conditioned with 1mL methanol and 1mL of deionised water. 1 mL of rat urine sample spiked with 10 µL of 1 µg mL<sup>-1</sup> of mephedrone-D<sub>3</sub> was loaded onto the cartridge. The washing step was carried out with 1mL of deionised water, 1mL 0.01 M HCl followed by 1mL of deionised water. The neutral fraction was obtained after eluting the cartridges with 2 mL of methanol, and the basic fraction with 1mL methanol/NH<sub>3</sub> 33% mix 98: 2 v/v. The extracts were evaporated to dryness under nitrogen at 40°C and re-dissolved in 100 µL of methanol. 50 µL were transferred to other vials and dried under nitrogen flow at 40 °C. For the analysis in GC-MS, rat urine was acetylated with 100 µL of a mixture acetic acid/pyridine 3:2 through microwave irradiation for 5 minutes at 450 W. After evaporation, the sample was reconstituted in 50 µL of methanol and then injected in a splitless injection mode into a GC-MS system. The analysis was performed using a Hewlett Packard (HP, Agilent, Waldbronn, Germany) 5890 Series II gas chromatograph combined with an HP 5972A MSD mass spectrometer and an HP MS ChemStation (DOS series) with HP G1034C software version C03.00. The column was Thermo Scientific TG-1MS capillary (12 m × 0.2 mm I.D.), cross-linked methyl silicone, 330 nm film thickness. The following GC conditions were set: injection port temperature at 280 °C, helium as carrier gas, 1mL min<sup>-1</sup> as flow rate. The column temperature was programmed from 100 to 310 °C at 30 °C min<sup>-1</sup>, initial time 2 min, final time 5 min. The MS conditions were as follows: electron ionization (EI) mode, 70 eV as ionization energy, ion source temperature at 220 °C and capillary direct interface heated at 280 °C. The acquisition was in full scan mode with m/z range from 50 to 550 uma.

However, due to the presence of co-eluting interferences, no distinguishable peaks for the enantiomers were found. No spectra corresponding to the (1-2 acetyl) hydroxyl-normephedrone were recorded.

**Table S7** Experimental set up of the reactors used for (a) incubating wastewater and (b) pHLM.

| (a)                                   | Wastewater reactors |         |       |         |
|---------------------------------------|---------------------|---------|-------|---------|
|                                       | Biotic              | Abiotic | Clean | Control |
| Mephedrone (100 ng mL <sup>-1</sup> ) | X                   | X       | X     |         |
| NaN <sub>3</sub>                      |                     | X       | X     |         |
| Demineralised water                   |                     |         | X     |         |
| Wastewater                            | X                   | X       |       | X       |

  

| (b)                           | Biological pHLM reactors |       |          |
|-------------------------------|--------------------------|-------|----------|
|                               | Incubation               | NoHLM | NoRegSys |
| Phosphate buffer pH 7.4       | X                        | X     | X        |
| Regenerating system (Reg Sys) | X                        | X     |          |
| Substrate solution            | X                        | X     | X        |
| SOD                           | X                        | X     | X        |
| HLM                           | X                        |       | X        |

**S2-Setup for pHLM incubation.**

*Experiment A.* (±)-Mephedrone was incubated at a concentration of 2.5 μM over 60 minutes in triplicate biological reactors. The reactors are described in Table S7b. 100 μL of each reactor contained 90 mM of phosphate buffer at pH 7.4, 25 μM of substrate solution and 20 U mL<sup>-1</sup> of Superoxide Dismutase (SOD). Apart from the “No HLM” reactor, 1 mg mL<sup>-1</sup> of pooled human liver microsomes (pHLM) (Corning, The Netherlands) was added to all reactors. The regenerating system consisted of isocitrate, MgCl<sub>2</sub> and NADP<sup>+</sup> (Biomol, Germany). Sampling points were set at 0, 10, 20, 30 and 60 minutes. The reaction was commenced with the addition of pHLM (37 °C) and it was stopped at each specified time points with the addition of ice cold acetonitrile containing IS at a concentration of 100 ng mL<sup>-1</sup>. Samples were shaken thoroughly and left in the freezer for 5 minutes. LLE was performed with 300 μL ethyl acetate (pH 8-9 adding sodium phosphate). Samples were then centrifuged for 5 minutes at 14680 rpm. The supernatant was gently evaporated to dryness under nitrogen flow. Finally, samples were reconstituted in 55 μL of 1mM ammonium acetate/methanol 85:15 and 5 μL were injected in chiral LC VP system.

*Experiment B.* Mephedrone was incubated at a final concentration of 10 μM over 180 minutes in biological duplicates. A single reactor consisted of: analyte solution, a buffer solution, containing 50 mM KH<sub>2</sub>PO<sub>4</sub> and 5 mM MgCl<sub>2</sub> at pH 7.4, a NADPH 50 mM solution and pHLM. Glucuronic acid and PAPS were used as substrates for the investigation of Phase II metabolism reactions, such as glucuronidation and sulfation respectively. Sampling points were set at 0, 10, 20, 30, 60 and 180 minutes for mephedrone incubation and at 180 minutes for phase II metabolism investigation. In this experiment, the blank contained the analyte but not the pHLM. IS was also added in the ice cold acetonitrile to all the incubated samples at the end of the reaction. Samples were shaken thoroughly and centrifuged for 10 minutes at 12000 rpm. Samples for the investigation of the phase II metabolism were evaporated at 40 °C and reconstituted in 100 μL of water/methanol 8:2. Ten microliters were injected in the liquid chromatograph coupled with quadrupole-time of flight (LC QTOF) system. LLE of the pHLM samples incubating normephedrone was performed with 300 μL ethyl acetate (pH 8-9 adding sodium phosphate). Samples were then centrifuged for 5 minutes at 14680 rpm. The supernatant was evaporated to dryness under nitrogen flow. Samples were reconstituted in 500 μL of 1mM ammonium acetate/methanol 85:15 v/v. 20 μL were injected in the chiral LC TQD system.



### S3-LC and MS source setting in the systems used.

#### TQD.

MS setting. The system operated with a capillary voltage of 3 kV, source temperature at 150 °C, desolvation temperature at 265 °C and desolvation gas flow at 550 L h<sup>-1</sup>. Nitrogen, supplied by a high purity nitrogen generator (Peak Scientific, UK), was used as a nebulising and desolvation gas. Argon (99.999%) was used as a collision gas.

#### LC-Q-E.

LC condition. Mobile phase A was a solution of 2 mM aqueous ammonium formate plus 0.1% formic acid at pH 3, whilst mobile phase B was a solution of 2 mM aqueous ammonium formate with acetonitrile:methanol (50:50, v/v; 1% water) plus 0.1% formic acid. The sample injection volume was 10 µL. The flow rate was set at 0.5 mL min<sup>-1</sup> for 10 min and at 0.8 mL min<sup>-1</sup> from 10 to 13.5 min. The mobile phase gradient was as follows: 0–1.0 min 99% A, 1–10 min to 1% A, 10–11.5 min hold 1% A, 11.5–13.5 min hold 99% A.

MS setting. Source spray voltage was at 3 kV (positive polarity) and at –4 kV (negative polarity); heater temperature and ion transfer capillary temperature were both set at 320 °C; S-lens RF level was at 60.0; sheath and auxiliary gases were 60 and 10 arbitrary units, respectively.

#### LC-QTOF.

LC condition. The injection volume of the sample was 10 µL. The chosen mobile phases delivered at 0.4 mL min<sup>-1</sup> were: A – 1mM NH<sub>4</sub>F in MilliQ-water; B – MeOH. The gradient was set as follows: 0-3 min 5% B, 3-4 min 5-60% B, 4-14 min 60% B, 14-14.1 min 60-98% B, 14.1-17 min 98% B, 17-17.1 min 98-5% B, 17.1-20 min 5% B.

MS setting. The capillary was set at 4500 V, the nebulizer gas at 3.0 bar, the dry gas at 11.0 L min<sup>-1</sup> and the dry temperature at 220°C.

**Table S8** MRM transitions in chiral LC-TQD method

| Compound                      | CV/<br>CE <sup>a</sup> | MRM1<br>(quantific<br>ation) | CV/<br>CE <sup>a</sup> | MRM2<br>(confirm<br>ation) | CV/<br>CE <sup>a</sup> | MRM3<br>(confirm<br>ation) | MRM1/<br>MRM2<br>ratio ±<br>SD | MRM1/<br>MRM3<br>ratio ±<br>SD | Internal<br>standard          |
|-------------------------------|------------------------|------------------------------|------------------------|----------------------------|------------------------|----------------------------|--------------------------------|--------------------------------|-------------------------------|
| Mephedrone                    | 10/12                  | 178.1 ><br>160.1             | 10/22                  | 178.1 ><br>145.0           | 10/22                  | 178.1 ><br>119.0           | 1.6 ± 0.2                      | 8.5 ± 2.1                      | Mephedrone-<br>D <sub>3</sub> |
| Normephedrone                 | 10/20                  | 164.0 ><br>131.0             | 10/32                  | 164.0 ><br>91.0            | -                      | -                          | 6.6 ± 0.8                      | -                              | Mephedrone-<br>D <sub>3</sub> |
| Mephedrone-<br>D <sub>3</sub> | 30/22                  | 181.1 ><br>163.1             | -                      | -                          | -                      | -                          | -                              | -                              | -                             |

<sup>a</sup>CV, cone voltage (V); CE, collision energy (eV)

**Table S9** Method validation parameters (chiral LC-TQD) for mephedrone and normephedrone.

| (a) | Compound                                 | R <sub>t</sub> <sup>a</sup><br>(min) | Rel.<br>R <sub>t</sub> <sup>a</sup> | Sample diluent                     |                       |                                                          | WWTP influent                                         |                                        |                                        |                        |      |
|-----|------------------------------------------|--------------------------------------|-------------------------------------|------------------------------------|-----------------------|----------------------------------------------------------|-------------------------------------------------------|----------------------------------------|----------------------------------------|------------------------|------|
|     |                                          |                                      |                                     | Linear range (µg L <sup>-1</sup> ) | R <sup>2</sup>        | IDL <sub>S/N</sub> <sup>b</sup><br>(µg L <sup>-1</sup> ) | IQL <sub>S/N</sub> <sup>c</sup> (µg L <sup>-1</sup> ) | MDL <sup>d</sup> (ng L <sup>-1</sup> ) | MQL <sup>e</sup> (ng L <sup>-1</sup> ) |                        |      |
|     | <i>R</i> -(+)-Mephedrone                 | 16.5 ± 0.4                           | 0.3                                 | 0.25-500                           | 0.9990                | 0.25                                                     | 0.50                                                  | 1.30                                   | 2.60                                   |                        |      |
|     | <i>S</i> -(-)-Mephedrone                 | 21.0 ± 0.5                           | 0.2                                 | 0.25-500                           | 0.9993                | 0.25                                                     | 0.50                                                  | 0.66                                   | 2.63                                   |                        |      |
|     | <i>R</i> -(+)-Normephedrone              | 44.2 ± 0.8                           | 6.5                                 | 0.25-500                           | 0.9915                | 0.25                                                     | 5.0                                                   | 1.35                                   | 26.9                                   |                        |      |
|     | <i>S</i> -(-)-Normephedrone              | 68.8 ± 1.4                           | 6.7                                 | 0.25-500                           | 0.9911                | 0.25                                                     | 5.0                                                   | 1.35                                   | 27.0                                   |                        |      |
| (b) | SPE recovery % (n=3)                     |                                      |                                     |                                    |                       |                                                          |                                                       |                                        |                                        |                        |      |
|     |                                          |                                      |                                     | 25 ng/L                            |                       | 250 ng/L                                                 |                                                       | 2500 ng/L                              |                                        |                        |      |
|     |                                          | <i>R</i> -(+)-Mephedrone             |                                     | 109.1 ± 3.2                        |                       | 99.3 ± 4.8                                               |                                                       | 80.7 ± 7.0                             |                                        |                        |      |
|     |                                          | <i>S</i> -(-)-Mephedrone             |                                     | 99.0 ± 8.5                         |                       | 99.1 ± 4.3                                               |                                                       | 87.2 ± 11.5                            |                                        |                        |      |
|     |                                          | <i>R</i> -(+)-Normephedrone          |                                     | 72.8 ± 1.3                         |                       | 97.4 ± 9.2                                               |                                                       | 108.5 ± 5.7                            |                                        |                        |      |
|     | <i>S</i> -(-)-Normephedrone              |                                      | 79.4 ± 0.8                          |                                    | 86.0 ± 2.0            |                                                          | 113.2 ± 1.4                                           |                                        |                                        |                        |      |
| (c) | Method precision; D represents day       |                                      |                                     |                                    |                       |                                                          |                                                       |                                        |                                        |                        |      |
|     |                                          | Intra-day RSD% (n=4)                 |                                     |                                    |                       |                                                          |                                                       |                                        |                                        |                        |      |
|     |                                          | 5 ng L <sup>-1</sup>                 | 5 ng L <sup>-1</sup>                | 5 ng L <sup>-1</sup>               | 50 ng L <sup>-1</sup> | 50 ng L <sup>-1</sup>                                    | 50 ng L <sup>-1</sup>                                 | 500 ng L <sup>-1</sup>                 | 500 ng L <sup>-1</sup>                 | 500 ng L <sup>-1</sup> |      |
|     |                                          | D 1                                  | D 2                                 | D 3                                | D 1                   | D 2                                                      | D 3                                                   | D 1                                    | D 2                                    | D 3                    |      |
|     |                                          | <i>R</i> -(+)-Mephedrone             | 9.8                                 | 13.7                               | 14.1                  | 3.6                                                      | 6.8                                                   | 14.6                                   | 3.7                                    | 10.0                   | 5.6  |
|     |                                          | <i>S</i> -(-)-Mephedrone             | 10.7                                | 12.0                               | 4.6                   | 5.2                                                      | 12.9                                                  | 8.4                                    | 9.2                                    | 3.7                    | 2.8  |
|     |                                          | <i>R</i> -(+)-Normephedrone          | 14.1                                | 20.8                               | 13.3                  | 2.8                                                      | 13.3                                                  | 8.3                                    | 1.5                                    | 5.5                    | 12.8 |
|     |                                          | <i>S</i> -(-)-Normephedrone          | 18.2                                | 11.2                               | 3.2                   | 17.4                                                     | 18.9                                                  | 0.5                                    | 13.9                                   | 7.9                    | 18.5 |
|     |                                          | Inter-day RSD% (n=3)                 |                                     |                                    |                       |                                                          |                                                       |                                        |                                        |                        |      |
|     |                                          |                                      | 5 ng L <sup>-1</sup>                |                                    | 50 ng L <sup>-1</sup> |                                                          |                                                       | 500 ng L <sup>-1</sup>                 |                                        |                        |      |
|     |                                          | <i>R</i> -(+)-Mephedrone             | 12.5                                |                                    | 8.3                   |                                                          |                                                       | 6.4                                    |                                        |                        |      |
|     |                                          | <i>S</i> -(-)-Mephedrone             | 9.1                                 |                                    | 8.8                   |                                                          |                                                       | 5.2                                    |                                        |                        |      |
|     |                                          | <i>R</i> -(+)-Normephedrone          | 10.3                                |                                    | 8.1                   |                                                          |                                                       | 6.6                                    |                                        |                        |      |
|     | <i>S</i> -(-)-Normephedrone              | 11.6                                 |                                     | 12.3                               |                       |                                                          | 13.4                                                  |                                        |                                        |                        |      |
| (d) | Instrumental precision; D represents day |                                      |                                     |                                    |                       |                                                          |                                                       |                                        |                                        |                        |      |
|     |                                          | Intra-day RSD% (n=4)                 |                                     |                                    |                       |                                                          |                                                       |                                        |                                        |                        |      |
|     |                                          | 5 µg L <sup>-1</sup>                 | 5 µg L <sup>-1</sup>                | 5 µg L <sup>-1</sup>               | 50 µg L <sup>-1</sup> | 50 µg L <sup>-1</sup>                                    | 50 µg L <sup>-1</sup>                                 | 500 µg L <sup>-1</sup>                 | 500 µg L <sup>-1</sup>                 | 500 µg L <sup>-1</sup> |      |
|     |                                          | D 1                                  | D 2                                 | D 3                                | D 1                   | D 2                                                      | D 3                                                   | D 1                                    | D 2                                    | D 3                    |      |
|     |                                          | <i>R</i> -(+)-Mephedrone             | 9.3                                 | 6.7                                | 5.5                   | 1.9                                                      | 5.7                                                   | 5.4                                    | 2.9                                    | 5.5                    | 4.4  |
|     |                                          | <i>S</i> -(-)-Mephedrone             | 3.5                                 | 6.7                                | 1.1                   | 3.6                                                      | 2.5                                                   | 2.7                                    | 9.3                                    | 4.3                    | 2.2  |
|     |                                          | <i>R</i> -(+)-Normephedrone          | 24.5                                | 5.4                                | 9.2                   | 11.5                                                     | 8.0                                                   | 8.2                                    | 3.7                                    | 3.0                    | 2.7  |
|     |                                          | <i>S</i> -(-)-Normephedrone          | 27.5                                | 12.4                               | 1.1                   | 5.6                                                      | 4.5                                                   | 6.6                                    | 4.3                                    | 2.1                    | 4.0  |
|     |                                          | Inter-day RSD% (n=3)                 |                                     |                                    |                       |                                                          |                                                       |                                        |                                        |                        |      |
|     |                                          |                                      | 5 µg L <sup>-1</sup>                |                                    | 50 µg L <sup>-1</sup> |                                                          |                                                       | 500 µg L <sup>-1</sup>                 |                                        |                        |      |
|     |                                          | <i>R</i> -(+)-Mephedrone             | 7.1                                 |                                    | 4.3                   |                                                          |                                                       | 4.3                                    |                                        |                        |      |

|                             |               |                        |                         |                          |
|-----------------------------|---------------|------------------------|-------------------------|--------------------------|
| <i>S</i> -(-)-Mephedrone    | 3.8           | 3.0                    | 5.2                     |                          |
| <i>R</i> -(+)-Normephedrone | 8.5           | 9.2                    | 3.1                     |                          |
| <i>S</i> -(-)-Normephedrone | 7.6           | 5.6                    | 3.5                     |                          |
| (e)                         | $R_s^f$       | $EF^g$                 |                         |                          |
|                             |               | $5 \mu\text{g L}^{-1}$ | $50 \mu\text{g L}^{-1}$ | $500 \mu\text{g L}^{-1}$ |
| Mephedrone                  | $1.4 \pm 0.1$ | $0.50 \pm 0.0$         | $0.50 \pm 0.0$          | $0.48 \pm 0.0$           |
| Normephedrone               | $4.0 \pm 0.4$ | $0.51 \pm 0.0$         | $0.50 \pm 0.0$          | $0.50 \pm 0.0$           |

<sup>a</sup> Retention time

<sup>b</sup> Instrumental Limit of Detection (IDL). It was determined at a concentration value giving a signal-to-noise ratio ( $S/N$ )  $\geq 3$  for all the MRM transitions selected for cocaine.

<sup>c</sup> Instrumental Limit of Quantification (IQL). It was determined at the minimum concentration value giving  $S/N \geq 10$  for all the MRM transitions.

<sup>d</sup> Method Detection Limit (MDL).

<sup>e</sup> Method Quantification Limit (MDL).

<sup>f</sup> Enantiomeric resolution.

<sup>g</sup> Enantiomeric fraction.

#### S4-Absolute configuration determination of mephedrone using circular dichroism (CD) and computational study

Due to lack of analytical standards of single mephedrone enantiomers, elution order of the peaks needed to be confirmed under used chromatographic conditions. The assignment of the peaks was only possible through CD analysis. Absolute configuration determination of mephedrone was undertaken using a Perkin Elmer Series 200 HPLC system (equipped with a temperature controlled autosampler and column compartment, pump and a UV/VIS detector) coupled with a Chirascan Circular Dichroism Spectrometer (Applied Photophysics) equipped with a quartz spectrophotometer cell type 585.3/Q/10 cuvettes with a path length of 10 mm for micro flow (Starna Scientific). The operating conditions are given in Table S10. Separation of mephedrone enantiomers was achieved as described Castrignanò et al. The background, represented by the mobile phase, was subtracted from CD spectra. UV absorbance and CD spectra were acquired simultaneously at  $\lambda_{max} = 265$  nm (Maskell, De Paoli et al. 2011) (Figure S7). The predicted UV data were slightly shifted in the spectrum obtained from computational study due to solvation effects on the electronic transitions when compared with the UV mephedrone spectrum reported by Maskell et al. (2011) (Maskell, De Paoli et al. 2011). Computational study was performed with ArgusLab 4.0 (Mark A. Thompson, Planaria Software LLC, WA, USA) and pre-optimised structures with AM1 using x-Ray coordinated as starting geometry. ZINDO-RPA was used to predict the UV-vis and CD transitions for ( $\pm$ )-mephedrone (Figure S8a) and for ( $\pm$ )-normephedrone (Figure S8b). In correspondence of the first maximum absorbance peak at 265 nm the first eluting mephedrone enantiomer rotated the plane of polarized light with a negative Cotton effect, whilst the second peak with a positive effect. By combining the information obtained from the experimental spectrum and the modelling study, it was possible to confirm that *R*-(+)-mephedrone eluted as the first enantiomer, while *S*-(-)-mephedrone as the second. Due to similar behaviour of the metabolite, also *R*-(+)-normephedrone and *S*-(-)-normephedrone were assessed as the first and second eluting enantiomers under the chromatographic conditions used.

**Table S10** Operating conditions for the absorbance and CD spectra of ( $\pm$ )-mephedrone

|                           |                                     |
|---------------------------|-------------------------------------|
| Wavelength                | 265 nm                              |
| Spectral bandwidth        | 1 nm                                |
| Step size                 | 1 nm                                |
| Concentration             | 170 $\mu\text{g mL}^{-1}$           |
| Solvent                   | 1mM ammonium acetate/methanol 85:15 |
| Time                      | 1000 s                              |
| Points                    | 10000                               |
| Samples                   | 4000                                |
| Temperature (QNW Peltier) | 25.02 °C                            |

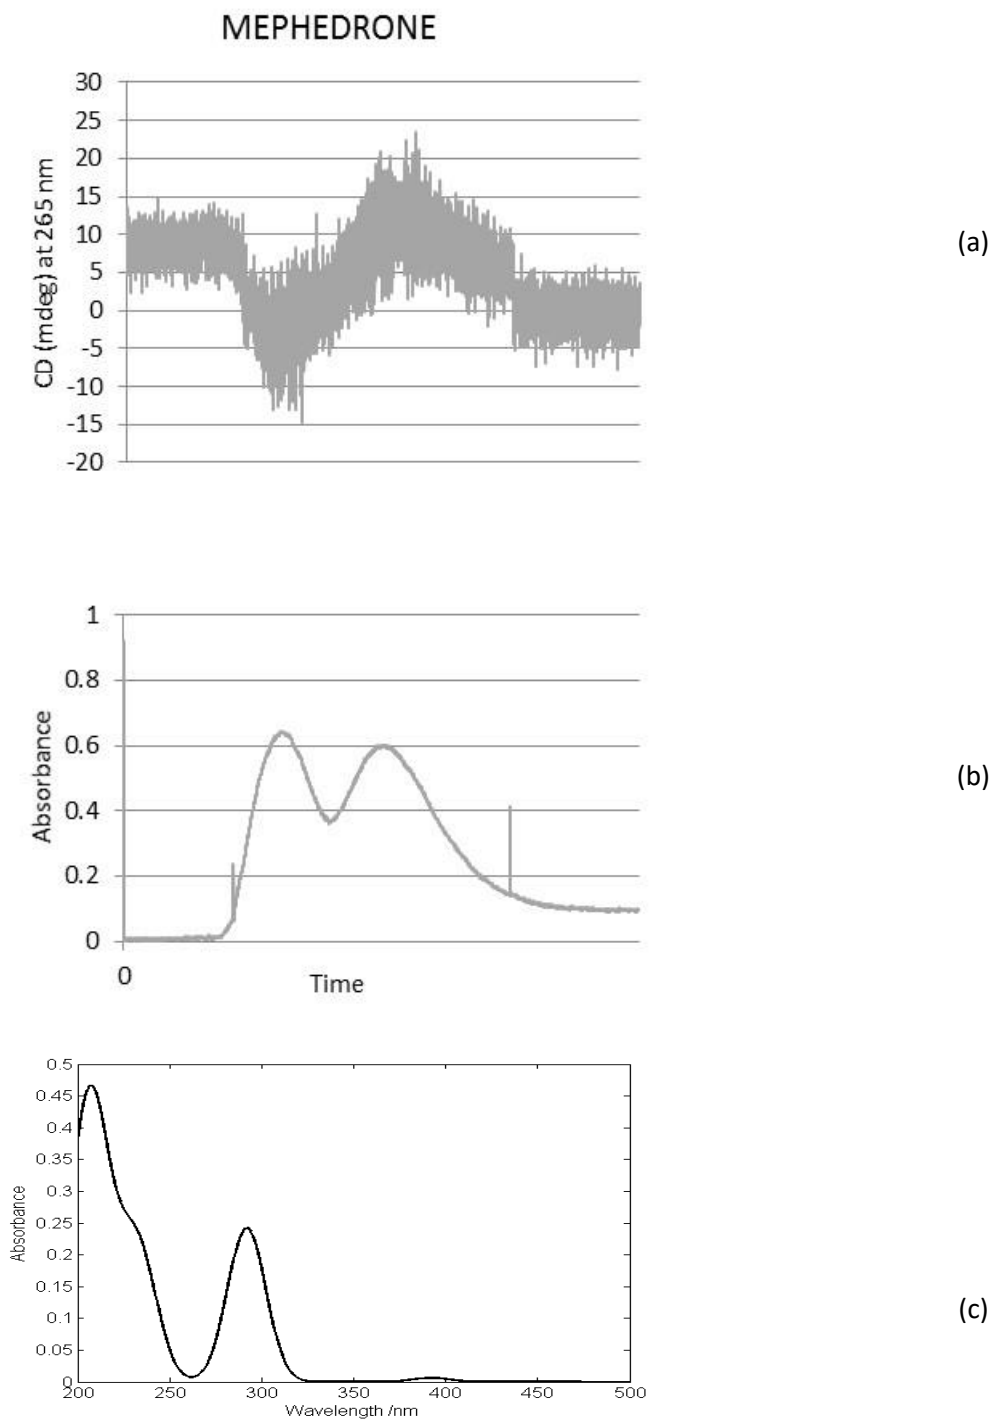

**Figure S7** CD and absorbance spectra of ( $\pm$ )-mephedrone (a,b). UV spectra of ( $\pm$ )-mephedrone from the computational study (c).

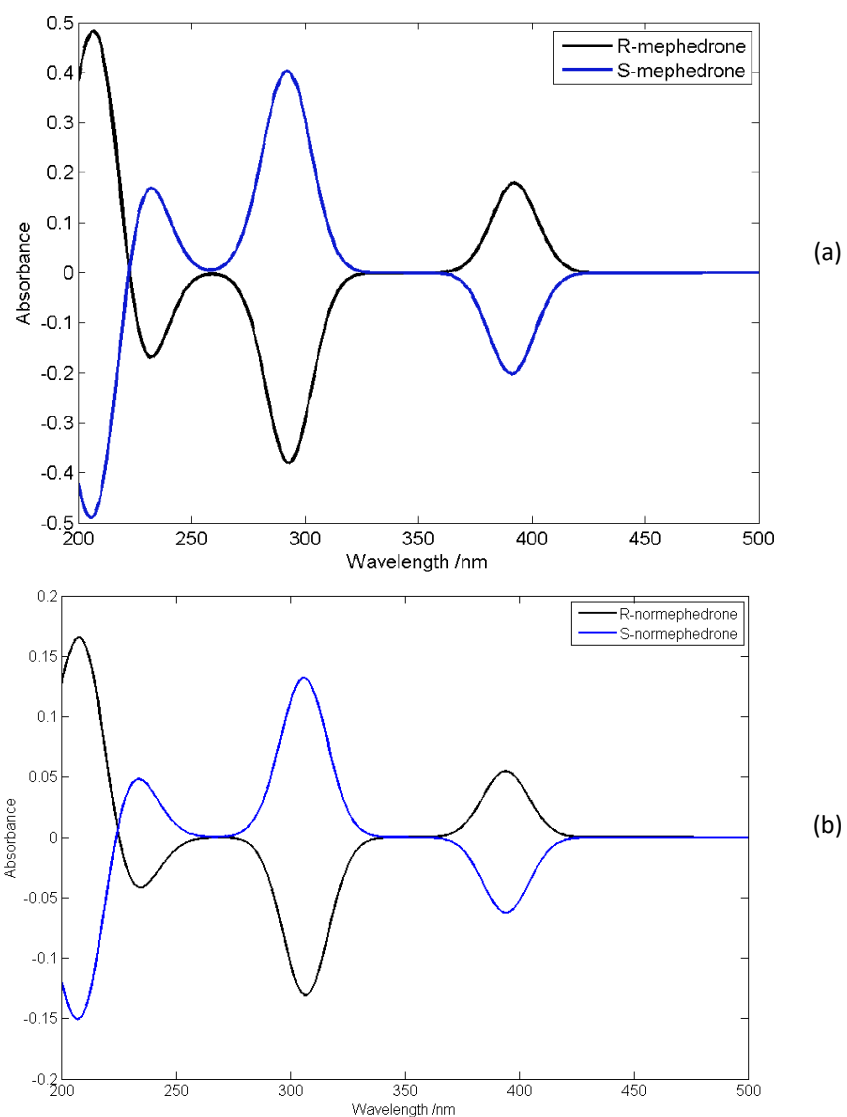

**Figure S8** Predicted CD spectra for ( $\pm$ )-mephedrone (a) and for ( $\pm$ )-normephedrone (b).
